# Supplementary material for: Adult-born granule cells modulate CA2 network activity during retrieval of developmental memories of the mother
Source: eLife. 2024 Jun 4;12:RP90600. doi: 10.7554/eLife.90600 (PMC11149928; doi:10.7554/eLife.90600)
Supplement: Figure 1—figure supplement 1—source data 1. [file elife-90600-fig1-figsupp1-data1.xlsx]

## Sheet: Sheet1
a
Genotype	Sex	Mother Investigation (pre-vGCV)	Novel Mother Investigation (pre-vGCV)	Mother Investigation (vGCV)	Novel Mother Investigation (vGCV)	Mother Investigation (post-vGCV)	Novel Mother Investigation (post-vGCV)
CD1	Male	82.52	111.83	89.07	129.95	120.83	96.76
CD1	Male	56.42	73.7	106.04	106.08	100.19	140.43
CD1	Male	40.91	63	53.92	89.8	46.52	83.31
CD1	Male	66.72	70.18	92.76	122.07	74.6	135.08
CD1	Male	28.6	66.2	69.39	130.63	62.48	151.51
CD1	Male	22.43	24.83	19.79	113.59	55	91.95
CD1	Male	65.71	62.83	87.4	105.11	91.55	75.44
CD1	Male	17.22	82.91	36.83	78.04	91.96	106.83
CD1	Female	34.59	44.96	28.27	42.48	42.36	36.64
CD1	Female	23.52	37	20.31	22.6	38.43	22.07
CD1	Female	42.23	63.59	34.51	48.19	27.36	41
CD1	Female	26.88	53.44	33.64	35.64	20.88	22.11
CD1	Female	25.16	40.95	25.43	44.48	20.16	29.27
CD1	Female	44.63	47.55	29.32	32.92	14.14	19.39
CD1	Female	23.96	33.48	13.27	24.68	13.27	16.91
CD1	Female	20.08	32.35	22.84	41.64	18.12	21.87
CD1	Female	21.15	25.92	21.03	50.79	14.71	27.4
GFAP-TK	Male	21.47	106.35	49.04	67.83	78.11	107.48
GFAP-TK	Male	71.24	116.2	83.28	75.4	52.79	128.64
GFAP-TK	Male	29.52	78.39	62.16	67.68	71.4	88.96
GFAP-TK	Male	46.27	45.03	42.7	44.66	100.28	98.51
GFAP-TK	Male	54.28	51.03	70.47	92.76	60.8	88.68
GFAP-TK	Male	61.76	77.59	106.6	86.71	66.3	58.02
GFAP-TK	Male	68.34	113.52	50.42	67.78	71.75	98.64
GFAP-TK	Female	43.28	53.04	41.31	33.92	36.32	31.2
GFAP-TK	Female	13.87	22.36	37.35	19.39	24.12	26.28
GFAP-TK	Female	20.99	26.28	38.64	25.51	23.16	27.15
GFAP-TK	Female	28.59	35.44	39.04	38.92	44.35	44.72
GFAP-TK	Female	50.6	61.11	36.6	34.11	28.44	33.76
GFAP-TK	Female	34.71	31.52	27.48	22.87	36.12	43.19
GFAP-TK	Female	28.68	24.32	45.03	41.71	37.07	75.91
b
Genotype	Sex	Treatment	Mother Investigation	Novel Mother Investigation
Nestin-cre	Male	Veh	17.5	21.6
Nestin-cre	Male	Veh	26.04	30.8
Nestin-cre	Male	Veh	22.9	22
Nestin-cre	Male	Veh	12.6	15.7
Nestin-cre	Male	Veh	20.82	22.6
Nestin-cre	Male	Veh	13.96	32.1
Nestin-cre	Male	Veh	15.26	13.2
Nestin-cre	Male	Veh	23.4	33.62
Nestin-cre	Male	Veh	25.56	27.12
Nestin-cre	Male	Veh	7.9	18.42
Nestin-cre	Male	Veh	61.75	54.84
Nestin-cre	Male	Veh	57.4	64.36
Nestin-cre	Male	Veh	25.14	47.46
Nestin-cre	Male	Veh	30.95	63.6
Nestin-cre	Male	Veh	47.1	66.76
Nestin-cre	Male	Veh	57.5	70.28
Nestin-cre	Male	Veh	41.1	54.3
Nestin-cre	Female	Veh	9.3	13.22
Nestin-cre	Female	Veh	10.76	16.08
Nestin-cre	Female	Veh	4.68	5.88
Nestin-cre	Female	Veh	3.4	5.02
Nestin-cre	Female	Veh	10.36	14.28
Nestin-cre	Female	Veh	6.56	9.86
Nestin-cre	Female	Veh	7.68	14.72
Nestin-cre	Female	Veh	7.52	19.38
Nestin-cre	Female	Veh	5.88	39.08
Nestin-cre	Female	Veh	8.1	9
Nestin-cre	Female	Veh	20.05	52
Nestin-cre	Female	Veh	20.9	46.88
Nestin-cre	Female	Veh	47.44	52.3
Nestin-cre	Female	Veh	19.65	31.12
Nestin-cre:Gi	Male	Veh	12.48	11.6
Nestin-cre:Gi	Male	Veh	5.04	9.06
Nestin-cre:Gi	Male	Veh	8.26	25.42
Nestin-cre:Gi	Male	Veh	13.68	16.2
Nestin-cre:Gi	Male	Veh	3.74	4.72
Nestin-cre:Gi	Male	Veh	6.94	12.94
Nestin-cre:Gi	Male	Veh	30.02	45.08
Nestin-cre:Gi	Male	Veh	9.28	9.96
Nestin-cre:Gi	Male	Veh	25.52	25.26
Nestin-cre:Gi	Male	Veh	4.5	5.28
Nestin-cre:Gi	Male	Veh	26.58	48.8
Nestin-cre:Gi	Male	Veh	25.6	21.6
Nestin-cre:Gi	Male	Veh	75.9	77
Nestin-cre:Gi	Male	Veh	18.2	12.3
Nestin-cre:Gi	Male	Veh	14.685	72.53
Nestin-cre:Gi	Male	Veh	43.66	35.98
Nestin-cre:Gi	Male	Veh	45.4	63.56
Nestin-cre:Gi	Male	Veh	49.465	74.8
Nestin-cre:Gi	Female	Veh	11.4	19.74
Nestin-cre:Gi	Female	Veh	9.24	6.96
Nestin-cre:Gi	Female	Veh	22	18.28
Nestin-cre:Gi	Female	Veh	8.6	8.32
Nestin-cre:Gi	Female	Veh	8.68	4.14
Nestin-cre:Gi	Female	Veh	18.3	23.44
Nestin-cre:Gi	Female	Veh	34.55	42.12
Nestin-cre:Gi	Female	Veh	15.78	9.06
Nestin-cre:Gi	Female	Veh	37.5	52.64
Nestin-cre:Gi	Female	Veh	14.75	28.48
Nestin-cre:Gi	Female	Veh	27.8	39.52
Nestin-cre:Gi	Female	Veh	31.45	45.8
Nestin-cre:Gi	Female	Veh	31	41.56
Nestin-cre:Gi	Female	Veh	23.85	30.52
Nestin-cre:Gi	Female	Veh	61.3	85.16
Nestin-cre	Male	CNO	23.24	30.64
Nestin-cre	Male	CNO	34.42	30.9
Nestin-cre	Male	CNO	40.14	42.4
Nestin-cre	Male	CNO	15.94	21.34
Nestin-cre	Male	CNO	28.66	38.38
Nestin-cre	Male	CNO	24.5	20.98
Nestin-cre	Male	CNO	47.22	43.36
Nestin-cre	Male	CNO	12.92	13.98
Nestin-cre	Male	CNO	11.16	27.28
Nestin-cre	Male	CNO	47.9	67.48
Nestin-cre	Male	CNO	34.26	79.6
Nestin-cre	Male	CNO	61	72.8
Nestin-cre	Male	CNO	70.6	73.28
Nestin-cre	Male	CNO	24.46	26.38
Nestin-cre	Male	CNO	22.74	76
Nestin-cre	Male	CNO	8.2	23.4
Nestin-cre	Female	CNO	6.38	9.66
Nestin-cre	Female	CNO	9.56	8.86
Nestin-cre	Female	CNO	4.52	8.92
Nestin-cre	Female	CNO	6.2	11.24
Nestin-cre	Female	CNO	7.54	8.08
Nestin-cre	Female	CNO	7.48	10.46
Nestin-cre	Female	CNO	11.92	12.2
Nestin-cre	Female	CNO	8.26	11.22
Nestin-cre	Female	CNO	3.84	8.22
Nestin-cre	Female	CNO	7.86	12.06
Nestin-cre	Female	CNO	8.28	8.48
Nestin-cre	Female	CNO	18.8	37.36
Nestin-cre	Female	CNO	42.55	38.25
Nestin-cre	Female	CNO	31.45	74.08
Nestin-cre	Female	CNO	21	34.48
Nestin-cre:Gi	Male	CNO	24.14	18.12
Nestin-cre:Gi	Male	CNO	4.66	4.28
Nestin-cre:Gi	Male	CNO	7.42	13.52
Nestin-cre:Gi	Male	CNO	23.84	29.48
Nestin-cre:Gi	Male	CNO	11.3	14.66
Nestin-cre:Gi	Male	CNO	39.92	33.1
Nestin-cre:Gi	Male	CNO	10.8	10.38
Nestin-cre:Gi	Male	CNO	36.5	9.04
Nestin-cre:Gi	Male	CNO	5.9	8.56
Nestin-cre:Gi	Male	CNO	14.14	17.26
Nestin-cre:Gi	Male	CNO	8.28	8.64
Nestin-cre:Gi	Male	CNO	37.04	31
Nestin-cre:Gi	Male	CNO	30.2	18.04
Nestin-cre:Gi	Male	CNO	47.82	57.96
Nestin-cre:Gi	Male	CNO	14.44	31.32
Nestin-cre:Gi	Male	CNO	75.4	63.64
Nestin-cre:Gi	Male	CNO	59.86	41.88
Nestin-cre:Gi	Female	CNO	10	10.48
Nestin-cre:Gi	Female	CNO	7.24	3.94
Nestin-cre:Gi	Female	CNO	11.38	9.72
Nestin-cre:Gi	Female	CNO	8.74	12.62
Nestin-cre:Gi	Female	CNO	8.86	8.88
Nestin-cre:Gi	Female	CNO	4.82	4.7
Nestin-cre:Gi	Female	CNO	4.06	8.56
Nestin-cre:Gi	Female	CNO	9.62	13.42
Nestin-cre:Gi	Female	CNO	34.12	25.12
Nestin-cre:Gi	Female	CNO	55.35	31.64
Nestin-cre:Gi	Female	CNO	8.4	10.48
Nestin-cre:Gi	Female	CNO	30.25	17.9
Nestin-cre:Gi	Female	CNO	14.94	25.06
Nestin-cre:Gi	Female	CNO	21.3	37.12
Nestin-cre:Gi	Female	CNO	17.4	20.28
Nestin-cre:Gi	Female	CNO	36.26	36.84
c
Genotype	Sex	Treatment	Mother Investigation	Novel Investigation
Nestin-cre	Male	Veh	62.16	45.9
Nestin-cre	Male	Veh	37.82	75.02
Nestin-cre	Male	Veh	30.04	55.74
Nestin-cre	Male	Veh	22.74	46.56
Nestin-cre	Male	Veh	61.7	42.66
Nestin-cre	Male	Veh	35.62	44.24
Nestin-cre	Male	Veh	30.22	59.42
Nestin-cre	Male	Veh	34.48	38.46
Nestin-cre	Male	Veh	32.78	72.86
Nestin-cre	Male	Veh	55.84	86.48
Nestin-cre	Male	Veh	5.14	9.22
Nestin-cre	Female	Veh	12.52	20.52
Nestin-cre	Female	Veh	7.38	11.96
Nestin-cre	Female	Veh	8.5	19.98
Nestin-cre	Female	Veh	9.96	13.48
Nestin-cre	Female	Veh	15.06	15.4
Nestin-cre	Female	Veh	13.52	19.84
Nestin-cre	Female	Veh	8.42	13.86
Nestin-cre	Female	Veh	14.5	13.22
Nestin-cre	Female	Veh	31.74	45.58
Nestin-cre	Female	Veh	8.28	12.84
Nestin-cre:Gi	Male	Veh	20.02	24.64
Nestin-cre:Gi	Male	Veh	55.62	85.06
Nestin-cre:Gi	Male	Veh	66.76	119.82
Nestin-cre:Gi	Male	Veh	18.62	38.72
Nestin-cre:Gi	Male	Veh	7.86	12.6
Nestin-cre:Gi	Male	Veh	28.52	47
Nestin-cre:Gi	Male	Veh	31.9	43.64
Nestin-cre:Gi	Male	Veh	12.98	25.52
Nestin-cre:Gi	Male	Veh	36.12	34.96
Nestin-cre:Gi	Male	Veh	50.34	40.86
Nestin-cre:Gi	Male	Veh	22.94	31.72
Nestin-cre:Gi	Female	Veh	12.84	28.08
Nestin-cre:Gi	Female	Veh	5.22	7.66
Nestin-cre:Gi	Female	Veh	11.58	19.34
Nestin-cre:Gi	Female	Veh	24.82	39.38
Nestin-cre:Gi	Female	Veh	13.14	16.98
Nestin-cre:Gi	Female	Veh	24	34.16
Nestin-cre	Male	CNO	36.72	76.12
Nestin-cre	Male	CNO	32.34	48.88
Nestin-cre	Male	CNO	46.72	48.1
Nestin-cre	Male	CNO	42.48	48.06
Nestin-cre	Male	CNO	60.3	60.94
Nestin-cre	Male	CNO	47.4	41.46
Nestin-cre	Male	CNO	49.98	65.94
Nestin-cre	Female	CNO	7.86	17.22
Nestin-cre	Female	CNO	7.8	10.9
Nestin-cre	Female	CNO	12.36	30.88
Nestin-cre	Female	CNO	10.46	19.28
Nestin-cre	Female	CNO	20.7	36.1
Nestin-cre	Female	CNO	9.52	19.78
Nestin-cre	Female	CNO	14.42	17
Nestin-cre	Female	CNO	16.78	21.02
Nestin-cre	Female	CNO	30.68	54.54
Nestin-cre	Female	CNO	4.04	9.7
Nestin-cre:Gi	Male	CNO	21.24	68.42
Nestin-cre:Gi	Male	CNO	13.26	36.42
Nestin-cre:Gi	Male	CNO	18.76	24.48
Nestin-cre:Gi	Male	CNO	41.36	47.08
Nestin-cre:Gi	Male	CNO	41.36	48.56
Nestin-cre:Gi	Male	CNO	14.54	20.92
Nestin-cre:Gi	Male	CNO	11.26	56.42
Nestin-cre:Gi	Male	CNO	53.28	84.38
Nestin-cre:Gi	Male	CNO	38.74	63.58
Nestin-cre:Gi	Female	CNO	14.2	40.56
Nestin-cre:Gi	Female	CNO	17.82	23.44
Nestin-cre:Gi	Female	CNO	11.14	45.98
Nestin-cre:Gi	Female	CNO	4.38	13.72
Nestin-cre:Gi	Female	CNO	9.86	19.18
Nestin-cre:Gi	Female	CNO	20.34	25.88
