# Supplementary material for: Adult-born granule cells modulate CA2 network activity during retrieval of developmental memories of the mother
Source: eLife. 2024 Jun 4;12:RP90600. doi: 10.7554/eLife.90600 (PMC11149928; doi:10.7554/eLife.90600)
Supplement: Figure 1—figure supplement 2—source data 1. [file elife-90600-fig1-figsupp2-data1.xlsx]

## Sheet: Sheet1
a
Genotype	Drug	Stimulus	Locomotion (%)
CD1	VGCV-	Mother	29.55
CD1	VGCV-	Mother	33.0333
CD1	VGCV-	Mother	41.2833
CD1	VGCV-	Mother	48.3667
CD1	VGCV-	Mother	29.8
CD1	VGCV-	Mother	44.0167
CD1	VGCV-	Mother	31.25
CD1	VGCV-	Mother	29.9667
CD1	VGCV-	Mother	27.9167
CD1	VGCV-	Mother	27.9333
CD1	VGCV-	Mother	34.2833
CD1	VGCV-	Mother	51.05
CD1	VGCV-	Mother	28.9833
CD1	VGCV-	Mother	34.9333
CD1	VGCV-	Mother	45.6833
CD1	VGCV-	Mother	52.95
CD1	VGCV-	Mother	39.5667
CD1	VGCV-	Novel	22.5333
CD1	VGCV-	Novel	44.1167
CD1	VGCV-	Novel	37.8
CD1	VGCV-	Novel	49.35
CD1	VGCV-	Novel	27.5667
CD1	VGCV-	Novel	34.05
CD1	VGCV-	Novel	22.9833
CD1	VGCV-	Novel	31.3333
CD1	VGCV-	Novel	30.25
CD1	VGCV-	Novel	27.9
CD1	VGCV-	Novel	30.0167
CD1	VGCV-	Novel	43.0333
CD1	VGCV-	Novel	20.6833
CD1	VGCV-	Novel	51.55
CD1	VGCV-	Novel	34.5833
CD1	VGCV-	Novel	43.9
CD1	VGCV-	Novel	28.0833
CD1	VGCV+	Mother	56.0833
CD1	VGCV+	Mother	48.7833
CD1	VGCV+	Mother	29.8167
CD1	VGCV+	Mother	25.4
CD1	VGCV+	Mother	31.2167
CD1	VGCV+	Mother	21.3667
CD1	VGCV+	Mother	34.6667
CD1	VGCV+	Mother	31.45
CD1	VGCV+	Mother	17.3167
CD1	VGCV+	Mother	30.3833
CD1	VGCV+	Mother	40.25
CD1	VGCV+	Mother	50.1667
CD1	VGCV+	Mother	43.2
CD1	VGCV+	Mother	39.7667
CD1	VGCV+	Mother	41.8667
CD1	VGCV+	Mother	34.7667
CD1	VGCV+	Mother	33.9333
CD1	VGCV+	Novel	38.4167
CD1	VGCV+	Novel	27.2167
CD1	VGCV+	Novel	42.0833
CD1	VGCV+	Novel	25.3667
CD1	VGCV+	Novel	22.2167
CD1	VGCV+	Novel	28.9
CD1	VGCV+	Novel	28.4
CD1	VGCV+	Novel	25.1
CD1	VGCV+	Novel	31.2333
CD1	VGCV+	Novel	29.2
CD1	VGCV+	Novel	37.15
CD1	VGCV+	Novel	35.4
CD1	VGCV+	Novel	35.2167
CD1	VGCV+	Novel	38.95
CD1	VGCV+	Novel	38.8833
CD1	VGCV+	Novel	42.9333
CD1	VGCV+	Novel	43.4
GFAP-TK	VGCV-	Mother	35.9
GFAP-TK	VGCV-	Mother	23.6667
GFAP-TK	VGCV-	Mother	39.3
GFAP-TK	VGCV-	Mother	38.0667
GFAP-TK	VGCV-	Mother	31.9333
GFAP-TK	VGCV-	Mother	54.6167
GFAP-TK	VGCV-	Mother	28.8833
GFAP-TK	VGCV-	Mother	52.9667
GFAP-TK	VGCV-	Mother	36.0167
GFAP-TK	VGCV-	Mother	30.2167
GFAP-TK	VGCV-	Mother	36.7167
GFAP-TK	VGCV-	Mother	33.9167
GFAP-TK	VGCV-	Mother	43.6333
GFAP-TK	VGCV-	Mother	36.0833
GFAP-TK	VGCV-	Novel	20.9333
GFAP-TK	VGCV-	Novel	26
GFAP-TK	VGCV-	Novel	42.4
GFAP-TK	VGCV-	Novel	44.45
GFAP-TK	VGCV-	Novel	42.9167
GFAP-TK	VGCV-	Novel	47.0833
GFAP-TK	VGCV-	Novel	32.2833
GFAP-TK	VGCV-	Novel	17.4
GFAP-TK	VGCV-	Novel	35.8167
GFAP-TK	VGCV-	Novel	25.75
GFAP-TK	VGCV-	Novel	34.95
GFAP-TK	VGCV-	Novel	27.9833
GFAP-TK	VGCV-	Novel	41.9667
GFAP-TK	VGCV-	Novel	41.6
GFAP-TK	VGCV+	Mother	33.5
GFAP-TK	VGCV+	Mother	44.75
GFAP-TK	VGCV+	Mother	28.9333
GFAP-TK	VGCV+	Mother	55.1167
GFAP-TK	VGCV+	Mother	36.1
GFAP-TK	VGCV+	Mother	32.5
GFAP-TK	VGCV+	Mother	44.0167
GFAP-TK	VGCV+	Mother	40.4
GFAP-TK	VGCV+	Mother	40.3833
GFAP-TK	VGCV+	Mother	30.8667
GFAP-TK	VGCV+	Mother	33.6667
GFAP-TK	VGCV+	Mother	31.0667
GFAP-TK	VGCV+	Mother	25.5333
GFAP-TK	VGCV+	Mother	21.7
GFAP-TK	VGCV+	Novel	29.7167
GFAP-TK	VGCV+	Novel	28.4333
GFAP-TK	VGCV+	Novel	35.15
GFAP-TK	VGCV+	Novel	32.95
GFAP-TK	VGCV+	Novel	34.8167
GFAP-TK	VGCV+	Novel	31.7333
GFAP-TK	VGCV+	Novel	37.7333
GFAP-TK	VGCV+	Novel	29.0667
GFAP-TK	VGCV+	Novel	36.9
GFAP-TK	VGCV+	Novel	38.5
GFAP-TK	VGCV+	Novel	35.4667
GFAP-TK	VGCV+	Novel	31.9
GFAP-TK	VGCV+	Novel	31.6333
GFAP-TK	VGCV+	Novel	22.85
b
Genotype	Drug	Locomotion: Baseline (%)
Nestin-cre	Veh	4.78889
Nestin-cre	Veh	15.1667
Nestin-cre	Veh	7.41111
Nestin-cre	Veh	8.85556
Nestin-cre	Veh	10.4778
Nestin-cre	Veh	4.44444
Nestin-cre	Veh	5.72222
Nestin-cre	CNO	9.17778
Nestin-cre	CNO	11.3444
Nestin-cre	CNO	1.27778
Nestin-cre	CNO	6.38889
Nestin-cre	CNO	1.58889
Nestin-cre	CNO	8.5
Nestin-cre	CNO	11.9444
Nestin-cre:Gi	Veh	7.36667
Nestin-cre:Gi	Veh	5.25556
Nestin-cre:Gi	Veh	15.3889
Nestin-cre:Gi	Veh	3.87778
Nestin-cre:Gi	Veh	9.14444
Nestin-cre:Gi	Veh	16.25
Nestin-cre:Gi	Veh	14.6
Nestin-cre:Gi	Veh	3.62222
Nestin-cre:Gi	Veh	4.8
Nestin-cre:Gi	CNO	3.56667
Nestin-cre:Gi	CNO	5.07778
Nestin-cre:Gi	CNO	9.36667
Nestin-cre:Gi	CNO	0.555556
Nestin-cre:Gi	CNO	12.9556
Nestin-cre:Gi	CNO	6.01111
Nestin-cre:Gi	CNO	11.0444
Nestin-cre:Gi	CNO	2.96667
Nestin-cre:Gi	CNO	10.7556
c
Genotype	Drug	Stimulus	Locomotion: Social (%)
Nestin-cre	Veh	Mother	43.3733
Nestin-cre	Veh	Mother	81.8933
Nestin-cre	Veh	Mother	53.9467
Nestin-cre	Veh	Mother	43.4133
Nestin-cre	Veh	Mother	48.6267
Nestin-cre	Veh	Mother	64.72
Nestin-cre	Veh	Mother	60.68
Nestin-cre	Veh	Novel	75.8133
Nestin-cre	Veh	Novel	76.3867
Nestin-cre	Veh	Novel	73.5867
Nestin-cre	Veh	Novel	56.6667
Nestin-cre	Veh	Novel	68.9467
Nestin-cre	Veh	Novel	56.96
Nestin-cre	Veh	Novel	58.36
Nestin-cre	CNO	Mother	76.2933
Nestin-cre	CNO	Mother	60.4933
Nestin-cre	CNO	Mother	75.28
Nestin-cre	CNO	Mother	63.9333
Nestin-cre	CNO	Mother	55.7333
Nestin-cre	CNO	Mother	77.2
Nestin-cre	CNO	Mother	63.24
Nestin-cre	CNO	Novel	71.2667
Nestin-cre	CNO	Novel	80.6933
Nestin-cre	CNO	Novel	62.1867
Nestin-cre	CNO	Novel	68.44
Nestin-cre	CNO	Novel	72.7733
Nestin-cre	CNO	Novel	76.5733
Nestin-cre	CNO	Novel	82.5867
Nestin-cre:Gi	Veh	Mother	77.2533
Nestin-cre:Gi	Veh	Mother	59.0933
Nestin-cre:Gi	Veh	Mother	65.1333
Nestin-cre:Gi	Veh	Mother	60.32
Nestin-cre:Gi	Veh	Mother	67.3733
Nestin-cre:Gi	Veh	Mother	75.16
Nestin-cre:Gi	Veh	Mother	62.3067
Nestin-cre:Gi	Veh	Mother	58.28
Nestin-cre:Gi	Veh	Mother	79.7467
Nestin-cre:Gi	Veh	Novel	79.8533
Nestin-cre:Gi	Veh	Novel	50.6
Nestin-cre:Gi	Veh	Novel	63.5467
Nestin-cre:Gi	Veh	Novel	66.04
Nestin-cre:Gi	Veh	Novel	88.2667
Nestin-cre:Gi	Veh	Novel	72.4667
Nestin-cre:Gi	Veh	Novel	66.0667
Nestin-cre:Gi	Veh	Novel	60.88
Nestin-cre:Gi	Veh	Novel	90.6533
Nestin-cre:Gi	CNO	Mother	67.3867
Nestin-cre:Gi	CNO	Mother	73.2
Nestin-cre:Gi	CNO	Mother	77.2
Nestin-cre:Gi	CNO	Mother	39.8667
Nestin-cre:Gi	CNO	Mother	76.44
Nestin-cre:Gi	CNO	Mother	58.6133
Nestin-cre:Gi	CNO	Mother	56.3067
Nestin-cre:Gi	CNO	Mother	57.8933
Nestin-cre:Gi	CNO	Mother	77.12
Nestin-cre:Gi	CNO	Novel	68.2667
Nestin-cre:Gi	CNO	Novel	70.3067
Nestin-cre:Gi	CNO	Novel	76.5733
Nestin-cre:Gi	CNO	Novel	41.9333
Nestin-cre:Gi	CNO	Novel	47.6667
Nestin-cre:Gi	CNO	Novel	64.9067
Nestin-cre:Gi	CNO	Novel	63.8133
Nestin-cre:Gi	CNO	Novel	50.96
Nestin-cre:Gi	CNO	Novel	74.16
