# Supplementary material for: Adult-born granule cells modulate CA2 network activity during retrieval of developmental memories of the mother
Source: eLife. 2024 Jun 4;12:RP90600. doi: 10.7554/eLife.90600 (PMC11149928; doi:10.7554/eLife.90600)
Supplement: Figure 1—source data 1. [file elife-90600-fig1-data1.xlsx]

## Sheet: Sheet1
b
Genotype	Treatment	Theta Power
Nestin-cre	Veh	1.21451
Nestin-cre	Veh	1.10231
Nestin-cre	Veh	1.53698
Nestin-cre	Veh	1.04707
Nestin-cre	Veh	1.14316
Nestin-cre	Veh	1.17015
Nestin-cre	Veh	1.38412
Nestin-cre	CNO	1.05097
Nestin-cre	CNO	0.966434
Nestin-cre	CNO	1.51036
Nestin-cre	CNO	1.32779
Nestin-cre	CNO	1.2869
Nestin-cre	CNO	0.924875
Nestin-cre	CNO	1.29518
Nestin-cre:Gi	Veh	1.76046
Nestin-cre:Gi	Veh	1.26832
Nestin-cre:Gi	Veh	0.906121
Nestin-cre:Gi	Veh	1.0676
Nestin-cre:Gi	Veh	1.25936
Nestin-cre:Gi	Veh	1.33384
Nestin-cre:Gi	Veh	1.58477
Nestin-cre:Gi	Veh	2.01567
Nestin-cre:Gi	Veh	1.19059
Nestin-cre:Gi	CNO	1.20576
Nestin-cre:Gi	CNO	1.14746
Nestin-cre:Gi	CNO	1.37218
Nestin-cre:Gi	CNO	1.25414
Nestin-cre:Gi	CNO	1.44588
Nestin-cre:Gi	CNO	0.943322
Nestin-cre:Gi	CNO	1.42265
Nestin-cre:Gi	CNO	1.60714
Nestin-cre:Gi	CNO	1.08026
d
Genotype	Treatment	Low Gamma Power
Nestin-cre	Veh	1.25543
Nestin-cre	Veh	1.21009
Nestin-cre	Veh	1.26911
Nestin-cre	Veh	0.764704
Nestin-cre	Veh	1.25615
Nestin-cre	Veh	1.09123
Nestin-cre	Veh	1.54359
Nestin-cre	CNO	0.942898
Nestin-cre	CNO	1.22118
Nestin-cre	CNO	1.39368
Nestin-cre	CNO	1.22055
Nestin-cre	CNO	1.27547
Nestin-cre	CNO	1.05525
Nestin-cre	CNO	1.3237
Nestin-cre:Gi	Veh	1.52606
Nestin-cre:Gi	Veh	1.17203
Nestin-cre:Gi	Veh	1.03278
Nestin-cre:Gi	Veh	0.984584
Nestin-cre:Gi	Veh	1.60715
Nestin-cre:Gi	Veh	1.61641
Nestin-cre:Gi	Veh	1.66296
Nestin-cre:Gi	Veh	2.01917
Nestin-cre:Gi	Veh	1.39791
Nestin-cre:Gi	CNO	1.07468
Nestin-cre:Gi	CNO	1.19645
Nestin-cre:Gi	CNO	1.41651
Nestin-cre:Gi	CNO	1.23989
Nestin-cre:Gi	CNO	1.94224
Nestin-cre:Gi	CNO	1.18023
Nestin-cre:Gi	CNO	1.12666
Nestin-cre:Gi	CNO	1.52363
Nestin-cre:Gi	CNO	1.01098
f
Genotype	Treatment	Mid Gamma Power
Nestin-cre	Veh	1.43084
Nestin-cre	Veh	1.16897
Nestin-cre	Veh	1.25664
Nestin-cre	Veh	0.832022
Nestin-cre	Veh	1.09833
Nestin-cre	Veh	0.997682
Nestin-cre	Veh	1.30538
Nestin-cre	CNO	0.986043
Nestin-cre	CNO	1.1889
Nestin-cre	CNO	1.499
Nestin-cre	CNO	1.12514
Nestin-cre	CNO	1.08347
Nestin-cre	CNO	1.07052
Nestin-cre	CNO	1.20461
Nestin-cre:Gi	Veh	1.51305
Nestin-cre:Gi	Veh	1.20634
Nestin-cre:Gi	Veh	0.968009
Nestin-cre:Gi	Veh	1.0953
Nestin-cre:Gi	Veh	1.49504
Nestin-cre:Gi	Veh	1.29693
Nestin-cre:Gi	Veh	1.65992
Nestin-cre:Gi	Veh	1.75613
Nestin-cre:Gi	Veh	1.07175
Nestin-cre:Gi	CNO	1.04516
Nestin-cre:Gi	CNO	1.16881
Nestin-cre:Gi	CNO	1.58736
Nestin-cre:Gi	CNO	1.18378
Nestin-cre:Gi	CNO	1.75367
Nestin-cre:Gi	CNO	1.18286
Nestin-cre:Gi	CNO	0.985155
Nestin-cre:Gi	CNO	1.25173
Nestin-cre:Gi	CNO	1.0728
