# Supplementary material for: Adult-born granule cells modulate CA2 network activity during retrieval of developmental memories of the mother
Source: eLife. 2024 Jun 4;12:RP90600. doi: 10.7554/eLife.90600 (PMC11149928; doi:10.7554/eLife.90600)
Supplement: Figure 2—source data 1. [file elife-90600-fig2-data1.xlsx]

## Sheet: Sheet1
e
Genotype	Treatment	Investigation
Nestin-cre	Veh	4.1
Nestin-cre	Veh	4.76
Nestin-cre	Veh	-0.9
Nestin-cre	Veh	3.1
Nestin-cre	Veh	1.78
Nestin-cre	Veh	18.14
Nestin-cre	Veh	-2.06
Nestin-cre	Veh	3.92
Nestin-cre	Veh	5.32
Nestin-cre	Veh	10.22
Nestin-cre	Veh	1.2
Nestin-cre	Veh	1.62
Nestin-cre	Veh	1.56
Nestin-cre	Veh	10.52
Nestin-cre	Veh	3.92
Nestin-cre	Veh	3.3
Nestin-cre	Veh	7.04
Nestin-cre	Veh	11.86
Nestin-cre	Veh	33.2
Nestin-cre	Veh	0.9
Nestin-cre	Veh	31.95
Nestin-cre	Veh	-6.91
Nestin-cre	Veh	25.98
Nestin-cre	Veh	6.96
Nestin-cre	Veh	22.32
Nestin-cre	Veh	32.65
Nestin-cre	Veh	4.86
Nestin-cre	Veh	19.66
Nestin-cre	Veh	12.78
Nestin-cre	Veh	11.47
Nestin-cre	Veh	13.2
Nestin-cre	CNO	7.4
Nestin-cre	CNO	-3.52
Nestin-cre	CNO	2.26
Nestin-cre	CNO	5.4
Nestin-cre	CNO	9.72
Nestin-cre	CNO	-3.52
Nestin-cre	CNO	-3.86
Nestin-cre	CNO	3.28
Nestin-cre	CNO	-0.7
Nestin-cre	CNO	1.06
Nestin-cre	CNO	4.4
Nestin-cre	CNO	5.04
Nestin-cre	CNO	16.12
Nestin-cre	CNO	0.54
Nestin-cre	CNO	2.98
Nestin-cre	CNO	0.28
Nestin-cre	CNO	2.96
Nestin-cre	CNO	4.38
Nestin-cre	CNO	4.2
Nestin-cre	CNO	0.2
Nestin-cre	CNO	18.56
Nestin-cre	CNO	19.58
Nestin-cre	CNO	-4.3
Nestin-cre	CNO	45.34
Nestin-cre	CNO	11.8
Nestin-cre	CNO	2.68
Nestin-cre	CNO	42.63
Nestin-cre	CNO	1.92
Nestin-cre	CNO	53.26
Nestin-cre	CNO	13.48
Nestin-cre	CNO	15.2
Nestin-cre:Gi	Veh	-0.88
Nestin-cre:Gi	Veh	4.02
Nestin-cre:Gi	Veh	8.34
Nestin-cre:Gi	Veh	17.16
Nestin-cre:Gi	Veh	-2.28
Nestin-cre:Gi	Veh	2.52
Nestin-cre:Gi	Veh	-3.72
Nestin-cre:Gi	Veh	-0.28
Nestin-cre:Gi	Veh	0.98
Nestin-cre:Gi	Veh	6
Nestin-cre:Gi	Veh	15.06
Nestin-cre:Gi	Veh	0.68
Nestin-cre:Gi	Veh	-0.26
Nestin-cre:Gi	Veh	0.78
Nestin-cre:Gi	Veh	22.22
Nestin-cre:Gi	Veh	-4.54
Nestin-cre:Gi	Veh	5.14
Nestin-cre:Gi	Veh	-4
Nestin-cre:Gi	Veh	7.57
Nestin-cre:Gi	Veh	-6.72
Nestin-cre:Gi	Veh	1.1
Nestin-cre:Gi	Veh	-5.9
Nestin-cre:Gi	Veh	15.14
Nestin-cre:Gi	Veh	13.73
Nestin-cre:Gi	Veh	11.72
Nestin-cre:Gi	Veh	57.845
Nestin-cre:Gi	Veh	14.35
Nestin-cre:Gi	Veh	10.56
Nestin-cre:Gi	Veh	6.67
Nestin-cre:Gi	Veh	23.86
Nestin-cre:Gi	Veh	-7.68
Nestin-cre:Gi	Veh	18.16
Nestin-cre:Gi	Veh	25.335
Nestin-cre:Gi	CNO	-6.02
Nestin-cre:Gi	CNO	-0.38
Nestin-cre:Gi	CNO	0.48
Nestin-cre:Gi	CNO	6.1
Nestin-cre:Gi	CNO	-3.3
Nestin-cre:Gi	CNO	5.64
Nestin-cre:Gi	CNO	-1.66
Nestin-cre:Gi	CNO	3.88
Nestin-cre:Gi	CNO	3.36
Nestin-cre:Gi	CNO	0.02
Nestin-cre:Gi	CNO	-6.82
Nestin-cre:Gi	CNO	-0.42
Nestin-cre:Gi	CNO	-27.46
Nestin-cre:Gi	CNO	2.66
Nestin-cre:Gi	CNO	3.12
Nestin-cre:Gi	CNO	-0.12
Nestin-cre:Gi	CNO	4.5
Nestin-cre:Gi	CNO	0.36
Nestin-cre:Gi	CNO	3.8
Nestin-cre:Gi	CNO	-9
Nestin-cre:Gi	CNO	-6.04
Nestin-cre:Gi	CNO	-12.16
Nestin-cre:Gi	CNO	-23.71
Nestin-cre:Gi	CNO	2.08
Nestin-cre:Gi	CNO	-12.35
Nestin-cre:Gi	CNO	10.14
Nestin-cre:Gi	CNO	10.12
Nestin-cre:Gi	CNO	15.82
Nestin-cre:Gi	CNO	2.88
Nestin-cre:Gi	CNO	0.58
Nestin-cre:Gi	CNO	16.88
Nestin-cre:Gi	CNO	-11.76
Nestin-cre:Gi	CNO	-17.98
f
Genotype	Treatment	Investigation
Nestin-cre	Veh	-16.26
Nestin-cre	Veh	37.2
Nestin-cre	Veh	25.7
Nestin-cre	Veh	23.82
Nestin-cre	Veh	-19.04
Nestin-cre	Veh	8.62
Nestin-cre	Veh	29.2
Nestin-cre	Veh	3.98
Nestin-cre	Veh	8
Nestin-cre	Veh	4.58
Nestin-cre	Veh	40.08
Nestin-cre	Veh	11.48
Nestin-cre	Veh	3.52
Nestin-cre	Veh	30.64
Nestin-cre	Veh	4.08
Nestin-cre	Veh	0.34
Nestin-cre	Veh	6.32
Nestin-cre	Veh	5.44
Nestin-cre	Veh	-1.28
Nestin-cre	Veh	13.84
Nestin-cre	Veh	4.56
Nestin-cre	CNO	39.4
Nestin-cre	CNO	16.54
Nestin-cre	CNO	1.38
Nestin-cre	CNO	5.58
Nestin-cre	CNO	0.64
Nestin-cre	CNO	9.36
Nestin-cre	CNO	3.1
Nestin-cre	CNO	-5.94
Nestin-cre	CNO	18.52
Nestin-cre	CNO	8.82
Nestin-cre	CNO	15.96
Nestin-cre	CNO	15.4
Nestin-cre	CNO	10.26
Nestin-cre	CNO	2.58
Nestin-cre	CNO	4.24
Nestin-cre	CNO	23.86
Nestin-cre	CNO	5.66
Nestin-cre:Gi	Veh	-12.6
Nestin-cre:Gi	Veh	4.62
Nestin-cre:Gi	Veh	15.24
Nestin-cre:Gi	Veh	29.44
Nestin-cre:Gi	Veh	2.44
Nestin-cre:Gi	Veh	53.06
Nestin-cre:Gi	Veh	7.76
Nestin-cre:Gi	Veh	14.56
Nestin-cre:Gi	Veh	20.1
Nestin-cre:Gi	Veh	4.74
Nestin-cre:Gi	Veh	18.48
Nestin-cre:Gi	Veh	11.74
Nestin-cre:Gi	Veh	12.54
Nestin-cre:Gi	Veh	-1.16
Nestin-cre:Gi	Veh	3.84
Nestin-cre:Gi	Veh	10.16
Nestin-cre:Gi	Veh	-9.48
Nestin-cre:Gi	Veh	8.78
Nestin-cre:Gi	CNO	47.18
Nestin-cre:Gi	CNO	23.16
Nestin-cre:Gi	CNO	26.36
Nestin-cre:Gi	CNO	5.62
Nestin-cre:Gi	CNO	34.84
Nestin-cre:Gi	CNO	5.72
Nestin-cre:Gi	CNO	9.34
Nestin-cre:Gi	CNO	5.72
Nestin-cre:Gi	CNO	7.2
Nestin-cre:Gi	CNO	6.38
Nestin-cre:Gi	CNO	45.16
Nestin-cre:Gi	CNO	9.32
Nestin-cre:Gi	CNO	5.54
Nestin-cre:Gi	CNO	31.1
Nestin-cre:Gi	CNO	24.84
h
Genotype	Treatment	Investigation
Nestin-cre	Veh	4.86
Nestin-cre	Veh	-0.74
Nestin-cre	Veh	13.6
Nestin-cre	Veh	3.76
Nestin-cre	Veh	21.44
Nestin-cre	Veh	-2.8
Nestin-cre	Veh	20.3
Nestin-cre	Veh	16.9
Nestin-cre	Veh	1.14
Nestin-cre	Veh	2.14
Nestin-cre	Veh	6.28
Nestin-cre	Veh	5
Nestin-cre	Veh	3.32
Nestin-cre	Veh	6.16
Nestin-cre	Veh	2.52
Nestin-cre	Veh	-1.08
Nestin-cre	Veh	-1.36
Nestin-cre	Veh	8.8
Nestin-cre	Veh	1.84
Nestin-cre	Veh	2.76
Nestin-cre	Veh	13.82
Nestin-cre	CNO	16.82
Nestin-cre	CNO	17.6
Nestin-cre	CNO	18.36
Nestin-cre	CNO	8.08
Nestin-cre	CNO	5.78
Nestin-cre	CNO	3.42
Nestin-cre	CNO	-1.44
Nestin-cre	CNO	0.14
Nestin-cre	CNO	2.02
Nestin-cre	CNO	4.66
Nestin-cre	CNO	8.96
Nestin-cre	CNO	9.76
Nestin-cre	CNO	2.08
Nestin-cre	CNO	29.58
Nestin-cre	CNO	2.4
Nestin-cre	CNO	3.12
Nestin-cre	CNO	-2.82
Nestin-cre	CNO	2.08
Nestin-cre	CNO	0.9
Nestin-cre	CNO	2.26
Nestin-cre	CNO	5.2
Nestin-cre:Gi	Veh	29.4
Nestin-cre:Gi	Veh	12.92
Nestin-cre:Gi	Veh	11.38
Nestin-cre:Gi	Veh	0.1
Nestin-cre:Gi	Veh	2.06
Nestin-cre:Gi	Veh	-1.44
Nestin-cre:Gi	Veh	4.68
Nestin-cre:Gi	Veh	18.56
Nestin-cre:Gi	Veh	-4.24
Nestin-cre:Gi	Veh	7.54
Nestin-cre:Gi	Veh	14.98
Nestin-cre:Gi	Veh	1.06
Nestin-cre:Gi	Veh	14.12
Nestin-cre:Gi	Veh	4.96
Nestin-cre:Gi	Veh	3.38
Nestin-cre:Gi	Veh	-5.6
Nestin-cre:Gi	Veh	9.56
Nestin-cre:Gi	Veh	2.06
Nestin-cre:Gi	CNO	1.8
Nestin-cre:Gi	CNO	4.08
Nestin-cre:Gi	CNO	-9.92
Nestin-cre:Gi	CNO	-0.2
Nestin-cre:Gi	CNO	6.9
Nestin-cre:Gi	CNO	14.78
Nestin-cre:Gi	CNO	7.6
Nestin-cre:Gi	CNO	3.28
Nestin-cre:Gi	CNO	-8.62
Nestin-cre:Gi	CNO	6.72
Nestin-cre:Gi	CNO	12.28
Nestin-cre:Gi	CNO	-5.88
Nestin-cre:Gi	CNO	3.08
Nestin-cre:Gi	CNO	4.4
Nestin-cre:Gi	CNO	1.22
Nestin-cre:Gi	CNO	1.7
Nestin-cre:Gi	CNO	24.54
Nestin-cre:Gi	CNO	-3.66
