# Supplementary material for: Adult-born granule cells modulate CA2 network activity during retrieval of developmental memories of the mother
Source: eLife. 2024 Jun 4;12:RP90600. doi: 10.7554/eLife.90600 (PMC11149928; doi:10.7554/eLife.90600)
Supplement: Figure 3—figure supplement 1—source data 1. [file elife-90600-fig3-figsupp1-data1.xlsx]

## Sheet: Sheet1
b
Genotype	Treatment	SWR Integral
Nestin-cre	Veh	0.264001
Nestin-cre	Veh	0.158981
Nestin-cre	Veh	0.24621
Nestin-cre	Veh	0.295272
Nestin-cre	Veh	0.245243
Nestin-cre	Veh	0.278253
Nestin-cre	Veh	0.251332
Nestin-cre	CNO	0.237578
Nestin-cre	CNO	0.225993
Nestin-cre	CNO	0.332546
Nestin-cre	CNO	0.338084
Nestin-cre	CNO	0.265489
Nestin-cre	CNO	0.278117
Nestin-cre	CNO	0.252389
Nestin-cre:Gi	Veh	0.342097
Nestin-cre:Gi	Veh	0.220675
Nestin-cre:Gi	Veh	0.211377
Nestin-cre:Gi	Veh	0.268174
Nestin-cre:Gi	Veh	0.27491
Nestin-cre:Gi	Veh	0.410804
Nestin-cre:Gi	Veh	0.205404
Nestin-cre:Gi	Veh	0.390767
Nestin-cre:Gi	Veh	0.458509
Nestin-cre:Gi	CNO	0.323897
Nestin-cre:Gi	CNO	0.221679
Nestin-cre:Gi	CNO	0.285701
Nestin-cre:Gi	CNO	0.277848
Nestin-cre:Gi	CNO	0.252536
Nestin-cre:Gi	CNO	0.243828
Nestin-cre:Gi	CNO	0.276892
Nestin-cre:Gi	CNO	0.301148
Nestin-cre:Gi	CNO	0.243881
c
Genotype	Treatment	SWR Duration
Nestin-cre	Veh	65.6011
Nestin-cre	Veh	53.4098
Nestin-cre	Veh	61.609
Nestin-cre	Veh	62.5641
Nestin-cre	Veh	57.9139
Nestin-cre	Veh	57.8871
Nestin-cre	Veh	63.2121
Nestin-cre	CNO	55.9449
Nestin-cre	CNO	57.8056
Nestin-cre	CNO	67.3666
Nestin-cre	CNO	66.2249
Nestin-cre	CNO	56.6004
Nestin-cre	CNO	60.4807
Nestin-cre	CNO	63.8287
Nestin-cre:Gi	Veh	76.154
Nestin-cre:Gi	Veh	55.392
Nestin-cre:Gi	Veh	57.8126
Nestin-cre:Gi	Veh	68.6555
Nestin-cre:Gi	Veh	89.7447
Nestin-cre:Gi	Veh	98.3063
Nestin-cre:Gi	Veh	60.8017
Nestin-cre:Gi	Veh	81.4109
Nestin-cre:Gi	Veh	101.872
Nestin-cre:Gi	CNO	60.8533
Nestin-cre:Gi	CNO	53.7504
Nestin-cre:Gi	CNO	61.4185
Nestin-cre:Gi	CNO	57.4522
Nestin-cre:Gi	CNO	60.3726
Nestin-cre:Gi	CNO	62.5004
Nestin-cre:Gi	CNO	60.3981
Nestin-cre:Gi	CNO	60.1119
Nestin-cre:Gi	CNO	50.9849
d
Genotype	Treatment	SWR Integral
Nestin-cre	Veh	0.259647
Nestin-cre	Veh	0.194416
Nestin-cre	Veh	0.22283
Nestin-cre	Veh	0.226519
Nestin-cre	CNO	0.149629
Nestin-cre	CNO	0.233665
Nestin-cre	CNO	0.249422
Nestin-cre	CNO	0.262767
Nestin-cre	CNO	0.25536
Nestin-cre:Gi	Veh	0.253676
Nestin-cre:Gi	Veh	0.220277
Nestin-cre:Gi	Veh	0.230462
Nestin-cre:Gi	Veh	0.291625
Nestin-cre:Gi	Veh	0.221609
Nestin-cre:Gi	Veh	0.253756
Nestin-cre:Gi	Veh	0.203217
Nestin-cre:Gi	Veh	0.235248
Nestin-cre:Gi	CNO	0.255415
Nestin-cre:Gi	CNO	0.272747
Nestin-cre:Gi	CNO	0.222288
Nestin-cre:Gi	CNO	0.192349
Nestin-cre:Gi	CNO	0.230824
Nestin-cre:Gi	CNO	0.17116
Nestin-cre:Gi	CNO	0.269473
Nestin-cre:Gi	CNO	0.258115
e
Genotype	Treatment	SWR Duration
Nestin-cre	Veh	73.5251
Nestin-cre	Veh	50.2472
Nestin-cre	Veh	45.3573
Nestin-cre	Veh	54.191
Nestin-cre	CNO	45.154
Nestin-cre	CNO	50.7153
Nestin-cre	CNO	66.0824
Nestin-cre	CNO	71.807
Nestin-cre	CNO	55.8166
Nestin-cre:Gi	Veh	78.2385
Nestin-cre:Gi	Veh	47.1472
Nestin-cre:Gi	Veh	47.8171
Nestin-cre:Gi	Veh	61.1975
Nestin-cre:Gi	Veh	64.0713
Nestin-cre:Gi	Veh	59.7625
Nestin-cre:Gi	Veh	57.0201
Nestin-cre:Gi	Veh	53.5724
Nestin-cre:Gi	CNO	47.4331
Nestin-cre:Gi	CNO	66.5756
Nestin-cre:Gi	CNO	44.9599
Nestin-cre:Gi	CNO	54.1295
Nestin-cre:Gi	CNO	48.0879
Nestin-cre:Gi	CNO	49.8917
Nestin-cre:Gi	CNO	56.2561
Nestin-cre:Gi	CNO	47.8535
