# Supplementary material for: Adult-born granule cells modulate CA2 network activity during retrieval of developmental memories of the mother
Source: eLife. 2024 Jun 4;12:RP90600. doi: 10.7554/eLife.90600 (PMC11149928; doi:10.7554/eLife.90600)
Supplement: Figure 3—figure supplement 2—source data 1. [file elife-90600-fig3-figsupp2-data1.xlsx]

## Sheet: Sheet1
a
Genotype	Drug	Stimulus	Normalized SWRs
Nestin-cre	Veh	Mother	1.80744
Nestin-cre	Veh	Mother	1.51155
Nestin-cre	Veh	Mother	2.47507
Nestin-cre	Veh	Mother	2.07901
Nestin-cre	Veh	Mother	2.90877
Nestin-cre	Veh	Mother	3.12786
Nestin-cre	Veh	Mother	2.37669
Nestin-cre	Veh	Novel	4.812
Nestin-cre	Veh	Novel	7.5402
Nestin-cre	Veh	Novel	4.86126
Nestin-cre	Veh	Novel	2.49659
Nestin-cre	Veh	Novel	2.98999
Nestin-cre	Veh	Novel	4.09212
Nestin-cre	Veh	Novel	2.95769
Nestin-cre	CNO	Mother	4.44851
Nestin-cre	CNO	Mother	2.53231
Nestin-cre	CNO	Mother	1.36248
Nestin-cre	CNO	Mother	2.66789
Nestin-cre	CNO	Mother	2.177
Nestin-cre	CNO	Mother	2.95223
Nestin-cre	CNO	Mother	3.12956
Nestin-cre	CNO	Novel	6.26966
Nestin-cre	CNO	Novel	5.67679
Nestin-cre	CNO	Novel	6.87623
Nestin-cre	CNO	Novel	4.1013
Nestin-cre	CNO	Novel	7.43852
Nestin-cre	CNO	Novel	1.93377
Nestin-cre	CNO	Novel	5.70954
Nestin-cre:Gi	Veh	Mother	5.64586
Nestin-cre:Gi	Veh	Mother	1.90713
Nestin-cre:Gi	Veh	Mother	2.21287
Nestin-cre:Gi	Veh	Mother	3.54277
Nestin-cre:Gi	Veh	Mother	3.48765
Nestin-cre:Gi	Veh	Mother	3.99907
Nestin-cre:Gi	Veh	Mother	2.91668
Nestin-cre:Gi	Veh	Mother	1.40575
Nestin-cre:Gi	Veh	Mother	9.30485
Nestin-cre:Gi	Veh	Novel	5.18627
Nestin-cre:Gi	Veh	Novel	2.75627
Nestin-cre:Gi	Veh	Novel	3.9359
Nestin-cre:Gi	Veh	Novel	4.79472
Nestin-cre:Gi	Veh	Novel	11.684
Nestin-cre:Gi	Veh	Novel	4.62046
Nestin-cre:Gi	Veh	Novel	4.33509
Nestin-cre:Gi	Veh	Novel	2.57053
Nestin-cre:Gi	Veh	Novel	12.4055
Nestin-cre:Gi	CNO	Mother	2.84881
Nestin-cre:Gi	CNO	Mother	4.42925
Nestin-cre:Gi	CNO	Mother	6.68211
Nestin-cre:Gi	CNO	Mother	1.90391
Nestin-cre:Gi	CNO	Mother	5.15754
Nestin-cre:Gi	CNO	Mother	2.71408
Nestin-cre:Gi	CNO	Mother	2.58134
Nestin-cre:Gi	CNO	Mother	5.01703
Nestin-cre:Gi	CNO	Mother	5.5196
Nestin-cre:Gi	CNO	Novel	6.37315
Nestin-cre:Gi	CNO	Novel	4.21781
Nestin-cre:Gi	CNO	Novel	2.67059
Nestin-cre:Gi	CNO	Novel	2.06952
Nestin-cre:Gi	CNO	Novel	4.08247
Nestin-cre:Gi	CNO	Novel	3.74345
Nestin-cre:Gi	CNO	Novel	2.2718
Nestin-cre:Gi	CNO	Novel	2.36818
Nestin-cre:Gi	CNO	Novel	2.45981
b
Genotype	Drug	Stimulus	Normalized SWRs
Nestin-cre	Veh	Mother	1.25013
Nestin-cre	Veh	Mother	1.76261
Nestin-cre	Veh	Mother	0.489547
Nestin-cre	Veh	Mother	0.171803
Nestin-cre	Veh	Novel	2.49039
Nestin-cre	Veh	Novel	2.1996
Nestin-cre	Veh	Novel	2.16739
Nestin-cre	Veh	Novel	2.43555
Nestin-cre	CNO	Mother	2.09519
Nestin-cre	CNO	Mother	2.4598
Nestin-cre	CNO	Mother	3.18528
Nestin-cre	CNO	Mother	2.35341
Nestin-cre	CNO	Mother	1.87011
Nestin-cre	CNO	Novel	2.42922
Nestin-cre	CNO	Novel	2.50888
Nestin-cre	CNO	Novel	3.45602
Nestin-cre	CNO	Novel	2.89743
Nestin-cre	CNO	Novel	3.18039
Nestin-cre:Gi	Veh	Mother	3.58593
Nestin-cre:Gi	Veh	Mother	2.56737
Nestin-cre:Gi	Veh	Mother	3.75008
Nestin-cre:Gi	Veh	Mother	1.9151
Nestin-cre:Gi	Veh	Mother	1.9543
Nestin-cre:Gi	Veh	Mother	3.20754
Nestin-cre:Gi	Veh	Novel	4.20351
Nestin-cre:Gi	Veh	Novel	3.5309
Nestin-cre:Gi	Veh	Novel	3.7802
Nestin-cre:Gi	Veh	Novel	3.19182
Nestin-cre:Gi	Veh	Novel	1.83888
Nestin-cre:Gi	Veh	Novel	3.614
Nestin-cre:Gi	CNO	Mother	2.64942
Nestin-cre:Gi	CNO	Mother	2.03407
Nestin-cre:Gi	CNO	Mother	2.5519
Nestin-cre:Gi	CNO	Mother	2.77807
Nestin-cre:Gi	CNO	Mother	2.5161
Nestin-cre:Gi	CNO	Mother	2.61327
Nestin-cre:Gi	CNO	Mother	1.8996
Nestin-cre:Gi	CNO	Novel	3.22966
Nestin-cre:Gi	CNO	Novel	2.01553
Nestin-cre:Gi	CNO	Novel	3.45654
Nestin-cre:Gi	CNO	Novel	4.65606
Nestin-cre:Gi	CNO	Novel	3.71854
Nestin-cre:Gi	CNO	Novel	3.02924
Nestin-cre:Gi	CNO	Novel	1.41004
