# Supplementary material for: Adult-born granule cells modulate CA2 network activity during retrieval of developmental memories of the mother
Source: eLife. 2024 Jun 4;12:RP90600. doi: 10.7554/eLife.90600 (PMC11149928; doi:10.7554/eLife.90600)
Supplement: Figure 3—figure supplement 3—source data 1. [file elife-90600-fig3-figsupp3-data1.xlsx]

## Sheet: Sheet1
b
Treatment	Genotype	Trial	SWR Frequency
Veh	Nestin-cre	Baseline	0.118731
Veh	Nestin-cre	Baseline	0.180523
Veh	Nestin-cre	Baseline	0.229358
Veh	Nestin-cre	Baseline	0.292969
Veh	Nestin-cre	Baseline	0.131531
Veh	Nestin-cre:Gi	Baseline	0.181298
Veh	Nestin-cre:Gi	Baseline	0.162104
Veh	Nestin-cre:Gi	Baseline	0.14678
Veh	Nestin-cre:Gi	Baseline	0.145677
Veh	Nestin-cre:Gi	Baseline	0.220984
Veh	Nestin-cre:Gi	Baseline	0.185874
Veh	Nestin-cre:Gi	Baseline	0.07837
Veh	Nestin-cre:Gi	Baseline	0.229274
Veh	Nestin-cre:Gi	Baseline	0.325472
Veh	Nestin-cre	Object	0.093809
Veh	Nestin-cre	Object	0.170949
Veh	Nestin-cre	Object	0.136031
Veh	Nestin-cre	Object	0.234731
Veh	Nestin-cre	Object	0.131604
Veh	Nestin-cre:Gi	Object	0.118731
Veh	Nestin-cre:Gi	Object	0.133945
Veh	Nestin-cre:Gi	Object	0.073613
Veh	Nestin-cre:Gi	Object	0.170713
Veh	Nestin-cre:Gi	Object	0.129007
Veh	Nestin-cre:Gi	Object	0.163349
Veh	Nestin-cre:Gi	Object	0.135009
Veh	Nestin-cre:Gi	Object	0.163399
Veh	Nestin-cre:Gi	Object	0.355843
CNO	Nestin-cre	Baseline	0.164868
CNO	Nestin-cre	Baseline	0.100729
CNO	Nestin-cre	Baseline	0.230369
CNO	Nestin-cre	Baseline	0.234136
CNO	Nestin-cre	Baseline	0.172944
CNO	Nestin-cre	Baseline	0.122827
CNO	Nestin-cre	Baseline	0.254503
CNO	Nestin-cre:Gi	Baseline	0.101215
CNO	Nestin-cre:Gi	Baseline	0.109729
CNO	Nestin-cre:Gi	Baseline	0.204599
CNO	Nestin-cre:Gi	Baseline	0.116171
CNO	Nestin-cre:Gi	Baseline	0.283218
CNO	Nestin-cre:Gi	Baseline	0.12856
CNO	Nestin-cre:Gi	Baseline	0.124202
CNO	Nestin-cre:Gi	Baseline	0.182552
CNO	Nestin-cre:Gi	Baseline	0.311556
CNO	Nestin-cre	Object	0.126008
CNO	Nestin-cre	Object	0.146935
CNO	Nestin-cre	Object	0.214582
CNO	Nestin-cre	Object	0.21609
CNO	Nestin-cre	Object	0.168184
CNO	Nestin-cre	Object	0.120953
CNO	Nestin-cre	Object	0.176207
CNO	Nestin-cre:Gi	Object	0.13125
CNO	Nestin-cre:Gi	Object	0.113007
CNO	Nestin-cre:Gi	Object	0.14609
CNO	Nestin-cre:Gi	Object	0.124157
CNO	Nestin-cre:Gi	Object	0.185883
CNO	Nestin-cre:Gi	Object	0.146542
CNO	Nestin-cre:Gi	Object	0.135073
CNO	Nestin-cre:Gi	Object	0.162063
CNO	Nestin-cre:Gi	Object	0.313344
c
Genotype	Treatment	SWR Frequency
Nestin-cre	Veh	0.0938086
Nestin-cre	Veh	0.170949
Nestin-cre	Veh	0.136031
Nestin-cre	Veh	0.234731
Nestin-cre	Veh	0.131604
Nestin-cre	CNO	0.126008
Nestin-cre	CNO	0.146935
Nestin-cre	CNO	0.161142
Nestin-cre	CNO	0.180471
Nestin-cre	CNO	0.168184
Nestin-cre	CNO	0.120953
Nestin-cre	CNO	0.176207
Nestin-cre:Gi	Veh	0.118731
Nestin-cre:Gi	Veh	0.133945
Nestin-cre:Gi	Veh	0.0736132
Nestin-cre:Gi	Veh	0.170713
Nestin-cre:Gi	Veh	0.129007
Nestin-cre:Gi	Veh	0.163349
Nestin-cre:Gi	Veh	0.135009
Nestin-cre:Gi	Veh	0.163399
Nestin-cre:Gi	CNO	0.13125
Nestin-cre:Gi	CNO	0.113007
Nestin-cre:Gi	CNO	0.14609
Nestin-cre:Gi	CNO	0.124157
Nestin-cre:Gi	CNO	0.185883
Nestin-cre:Gi	CNO	0.146542
Nestin-cre:Gi	CNO	0.135073
Nestin-cre:Gi	CNO	0.162063
Nestin-cre:Gi	CNO	0.294061
d
Genotype	Treatment	SWR Integral
Nestin-cre	Veh	0.28873
Nestin-cre	Veh	0.154318
Nestin-cre	Veh	0.299886
Nestin-cre	Veh	0.19981
Nestin-cre	Veh	0.265876
Nestin-cre	CNO	0.244804
Nestin-cre	CNO	0.213661
Nestin-cre	CNO	0.16269
Nestin-cre	CNO	0.305637
Nestin-cre	CNO	0.264205
Nestin-cre	CNO	0.237239
Nestin-cre	CNO	0.190757
Nestin-cre:Gi	Veh	0.378291
Nestin-cre:Gi	Veh	0.185687
Nestin-cre:Gi	Veh	0.372824
Nestin-cre:Gi	Veh	0.179934
Nestin-cre:Gi	Veh	0.306361
Nestin-cre:Gi	Veh	0.228753
Nestin-cre:Gi	Veh	0.216415
Nestin-cre:Gi	Veh	0.295353
Nestin-cre:Gi	Veh	0.221361
Nestin-cre:Gi	CNO	0.193184
Nestin-cre:Gi	CNO	0.234907
Nestin-cre:Gi	CNO	0.206694
Nestin-cre:Gi	CNO	0.270493
Nestin-cre:Gi	CNO	0.285472
Nestin-cre:Gi	CNO	0.161967
Nestin-cre:Gi	CNO	0.235225
Nestin-cre:Gi	CNO	0.242147
Nestin-cre:Gi	CNO	0.200628
e
Genotype	Treatment	SWR Duration
Nestin-cre	Veh	58.8603
Nestin-cre	Veh	46.7352
Nestin-cre	Veh	59.5708
Nestin-cre	Veh	56.3978
Nestin-cre	Veh	52.2505
Nestin-cre	CNO	51.5306
Nestin-cre	CNO	53.3966
Nestin-cre	CNO	48.8008
Nestin-cre	CNO	80.17
Nestin-cre	CNO	61.7668
Nestin-cre	CNO	48.1796
Nestin-cre	CNO	47.3646
Nestin-cre:Gi	Veh	70.4484
Nestin-cre:Gi	Veh	49.6852
Nestin-cre:Gi	Veh	71.9383
Nestin-cre:Gi	Veh	54.3243
Nestin-cre:Gi	Veh	61.9134
Nestin-cre:Gi	Veh	61.1506
Nestin-cre:Gi	Veh	69.4459
Nestin-cre:Gi	Veh	64.3278
Nestin-cre:Gi	Veh	73.3409
Nestin-cre:Gi	CNO	66.3558
Nestin-cre:Gi	CNO	53.1463
Nestin-cre:Gi	CNO	48.1964
Nestin-cre:Gi	CNO	61.4805
Nestin-cre:Gi	CNO	60.5806
Nestin-cre:Gi	CNO	47.2133
Nestin-cre:Gi	CNO	50.9647
Nestin-cre:Gi	CNO	65.789
Nestin-cre:Gi	CNO	56.8851
f
Genotype	Treatment	SWR Peak z-score
Nestin-cre	Veh	14.2241
Nestin-cre	Veh	8.64691
Nestin-cre	Veh	15.6576
Nestin-cre	Veh	10.4624
Nestin-cre	Veh	14.8518
Nestin-cre	CNO	13.2054
Nestin-cre	CNO	10.314
Nestin-cre	CNO	9.29681
Nestin-cre	CNO	13.065
Nestin-cre	CNO	13.163
Nestin-cre	CNO	14.6657
Nestin-cre	CNO	12.0805
Nestin-cre:Gi	Veh	17.9175
Nestin-cre:Gi	Veh	10.7628
Nestin-cre:Gi	Veh	15.9845
Nestin-cre:Gi	Veh	9.19403
Nestin-cre:Gi	Veh	13.4315
Nestin-cre:Gi	Veh	9.90545
Nestin-cre:Gi	Veh	7.14405
Nestin-cre:Gi	Veh	13.0081
Nestin-cre:Gi	Veh	11.7047
Nestin-cre:Gi	CNO	7.21538
Nestin-cre:Gi	CNO	12.2611
Nestin-cre:Gi	CNO	12.2431
Nestin-cre:Gi	CNO	13.7915
Nestin-cre:Gi	CNO	14.8851
Nestin-cre:Gi	CNO	8.0839
Nestin-cre:Gi	CNO	13.2468
Nestin-cre:Gi	CNO	11.7052
Nestin-cre:Gi	CNO	11.85
