# Supplementary material for: Adult-born granule cells modulate CA2 network activity during retrieval of developmental memories of the mother
Source: eLife. 2024 Jun 4;12:RP90600. doi: 10.7554/eLife.90600 (PMC11149928; doi:10.7554/eLife.90600)
Supplement: Figure 3—source data 1. [file elife-90600-fig3-data1.xlsx]

## Sheet: Sheet1
e
Treatment	Genotype	Trial	SWR Frequency
Veh	Nestin-cre	Baseline	0.156075
Veh	Nestin-cre	Baseline	0.121044
Veh	Nestin-cre	Baseline	0.178993
Veh	Nestin-cre	Baseline	0.127075
Veh	Nestin-cre	Baseline	0.144805
Veh	Nestin-cre	Baseline	0.190078
Veh	Nestin-cre:Gi	Baseline	0.209202
Veh	Nestin-cre:Gi	Baseline	0.139942
Veh	Nestin-cre:Gi	Baseline	0.12402
Veh	Nestin-cre:Gi	Baseline	0.122786
Veh	Nestin-cre:Gi	Baseline	0.245124
Veh	Nestin-cre:Gi	Baseline	0.065442
Veh	Nestin-cre:Gi	Baseline	0.143388
Veh	Nestin-cre:Gi	Baseline	0.115152
Veh	Nestin-cre	Social	0.505755
Veh	Nestin-cre	Social	0.483082
Veh	Nestin-cre	Social	0.637725
Veh	Nestin-cre	Social	0.283216
Veh	Nestin-cre	Social	0.418932
Veh	Nestin-cre	Social	0.499952
Veh	Nestin-cre:Gi	Social	1.12738
Veh	Nestin-cre:Gi	Social	0.306678
Veh	Nestin-cre:Gi	Social	0.358654
Veh	Nestin-cre:Gi	Social	0.509385
Veh	Nestin-cre:Gi	Social	1.75974
Veh	Nestin-cre:Gi	Social	0.218964
Veh	Nestin-cre:Gi	Social	0.283136
Veh	Nestin-cre:Gi	Social	1.26909
CNO	Nestin-cre	Baseline	0.144573
CNO	Nestin-cre	Baseline	0.149485
CNO	Nestin-cre	Baseline	0.127885
CNO	Nestin-cre	Baseline	0.144658
CNO	Nestin-cre	Baseline	0.11155
CNO	Nestin-cre	Baseline	0.205642
CNO	Nestin-cre:Gi	Baseline	0.139513
CNO	Nestin-cre:Gi	Baseline	0.142659
CNO	Nestin-cre:Gi	Baseline	0.121792
CNO	Nestin-cre:Gi	Baseline	0.163538
CNO	Nestin-cre:Gi	Baseline	0.135558
CNO	Nestin-cre:Gi	Baseline	0.129794
CNO	Nestin-cre:Gi	Baseline	0.132786
CNO	Nestin-cre:Gi	Baseline	0.072942
CNO	Nestin-cre	Social	0.72301
CNO	Nestin-cre	Social	0.581228
CNO	Nestin-cre	Social	0.338062
CNO	Nestin-cre	Social	0.434698
CNO	Nestin-cre	Social	0.41572
CNO	Nestin-cre	Social	0.909528
CNO	Nestin-cre:Gi	Social	0.535975
CNO	Nestin-cre:Gi	Social	0.59038
CNO	Nestin-cre:Gi	Social	0.544437
CNO	Nestin-cre:Gi	Social	0.311245
CNO	Nestin-cre:Gi	Social	0.589193
CNO	Nestin-cre:Gi	Social	0.304117
CNO	Nestin-cre:Gi	Social	0.402245
CNO	Nestin-cre:Gi	Social	0.301546
f
Genotype	Treatment	SWR DS
Nestin-cre	Veh	3.00456
Nestin-cre	Veh	6.02866
Nestin-cre	Veh	2.38618
Nestin-cre	Veh	0.417573
Nestin-cre	Veh	0.0812218
Nestin-cre	Veh	0.964253
Nestin-cre	Veh	0.581004
Nestin-cre	CNO	1.82115
Nestin-cre	CNO	3.14447
Nestin-cre	CNO	5.51374
Nestin-cre	CNO	1.4334
Nestin-cre	CNO	5.26152
Nestin-cre	CNO	-1.01846
Nestin-cre	CNO	2.57997
Nestin-cre:Gi	Veh	-0.459594
Nestin-cre:Gi	Veh	0.849149
Nestin-cre:Gi	Veh	1.72303
Nestin-cre:Gi	Veh	1.25195
Nestin-cre:Gi	Veh	8.19636
Nestin-cre:Gi	Veh	0.621392
Nestin-cre:Gi	Veh	1.41842
Nestin-cre:Gi	Veh	1.16479
Nestin-cre:Gi	Veh	3.10069
Nestin-cre:Gi	CNO	3.52434
Nestin-cre:Gi	CNO	-0.21144
Nestin-cre:Gi	CNO	-4.01152
Nestin-cre:Gi	CNO	0.165606
Nestin-cre:Gi	CNO	-1.07506
Nestin-cre:Gi	CNO	1.02936
Nestin-cre:Gi	CNO	-0.30954
Nestin-cre:Gi	CNO	-2.64885
Nestin-cre:Gi	CNO	-3.05979
g
Genotype	Treatment	SWR Frequency (Social)
Nestin-cre	Veh	0.505755
Nestin-cre	Veh	0.463387
Nestin-cre	Veh	0.637725
Nestin-cre	Veh	0.283216
Nestin-cre	Veh	0.418932
Nestin-cre	Veh	0.437123
Nestin-cre	Veh	0.499952
Nestin-cre	CNO	0.72301
Nestin-cre	CNO	0.581228
Nestin-cre	CNO	0.338062
Nestin-cre	CNO	0.434698
Nestin-cre	CNO	0.41572
Nestin-cre	CNO	0.410202
Nestin-cre	CNO	0.909528
Nestin-cre:Gi	Veh	1.10421
Nestin-cre:Gi	Veh	0.306678
Nestin-cre:Gi	Veh	0.358654
Nestin-cre:Gi	Veh	0.509385
Nestin-cre:Gi	Veh	0.927156
Nestin-cre:Gi	Veh	0.862515
Nestin-cre:Gi	Veh	0.218964
Nestin-cre:Gi	Veh	0.283136
Nestin-cre:Gi	Veh	0.888743
Nestin-cre:Gi	CNO	0.535975
Nestin-cre:Gi	CNO	0.59038
Nestin-cre:Gi	CNO	0.544437
Nestin-cre:Gi	CNO	0.311245
Nestin-cre:Gi	CNO	0.589193
Nestin-cre:Gi	CNO	0.437037
Nestin-cre:Gi	CNO	0.304117
Nestin-cre:Gi	CNO	0.402245
Nestin-cre:Gi	CNO	0.301546
h
Genotype	Treatment	SWR Peak z-score (Social)
Nestin-cre	Veh	10.7141
Nestin-cre	Veh	7.48784
Nestin-cre	Veh	12.2425
Nestin-cre	Veh	14.5209
Nestin-cre	Veh	12.1793
Nestin-cre	Veh	15.6205
Nestin-cre	Veh	11.6739
Nestin-cre	CNO	12.1704
Nestin-cre	CNO	10.8779
Nestin-cre	CNO	14.7241
Nestin-cre	CNO	15.761
Nestin-cre	CNO	13.7082
Nestin-cre	CNO	13.3034
Nestin-cre	CNO	12.1021
Nestin-cre:Gi	Veh	11.9768
Nestin-cre:Gi	Veh	11.2702
Nestin-cre:Gi	Veh	9.68514
Nestin-cre:Gi	Veh	11.146
Nestin-cre:Gi	Veh	10.548
Nestin-cre:Gi	Veh	12.0208
Nestin-cre:Gi	Veh	7.61047
Nestin-cre:Gi	Veh	13.5997
Nestin-cre:Gi	Veh	13.9463
Nestin-cre:Gi	CNO	16.357
Nestin-cre:Gi	CNO	11.5254
Nestin-cre:Gi	CNO	13.559
Nestin-cre:Gi	CNO	16.3125
Nestin-cre:Gi	CNO	12.7373
Nestin-cre:Gi	CNO	11.1272
Nestin-cre:Gi	CNO	13.4748
Nestin-cre:Gi	CNO	17.4354
Nestin-cre:Gi	CNO	13.3451
i
Genotype	Treatment	SWR Frequency (Baseline)
Nestin-cre	Veh	0.156075
Nestin-cre	Veh	0.121044
Nestin-cre	Veh	0.178993
Nestin-cre	Veh	0.127075
Nestin-cre	Veh	0.144805
Nestin-cre	Veh	0.130525
Nestin-cre	Veh	0.190078
Nestin-cre	CNO	0.144573
Nestin-cre	CNO	0.149485
Nestin-cre	CNO	0.127885
Nestin-cre	CNO	0.144658
Nestin-cre	CNO	0.11155
Nestin-cre	CNO	0.167989
Nestin-cre	CNO	0.205642
Nestin-cre:Gi	Veh	0.209202
Nestin-cre:Gi	Veh	0.139942
Nestin-cre:Gi	Veh	0.12402
Nestin-cre:Gi	Veh	0.122786
Nestin-cre:Gi	Veh	0.245124
Nestin-cre:Gi	Veh	0.204665
Nestin-cre:Gi	Veh	0.0654419
Nestin-cre:Gi	Veh	0.143388
Nestin-cre:Gi	Veh	0.115152
Nestin-cre:Gi	CNO	0.139513
Nestin-cre:Gi	CNO	0.142658
Nestin-cre:Gi	CNO	0.121792
Nestin-cre:Gi	CNO	0.163538
Nestin-cre:Gi	CNO	0.135558
Nestin-cre:Gi	CNO	0.144626
Nestin-cre:Gi	CNO	0.129794
Nestin-cre:Gi	CNO	0.132786
Nestin-cre:Gi	CNO	0.0729424
j
Genotype	Treatment	SWR Peak z-score (Baseline)
Nestin-cre	Veh	9.87092
Nestin-cre	Veh	7.0144
Nestin-cre	Veh	12.9051
Nestin-cre	Veh	15.5395
Nestin-cre	Veh	13.6153
Nestin-cre	Veh	15.2823
Nestin-cre	Veh	11.1965
Nestin-cre	CNO	12.3284
Nestin-cre	CNO	9.11872
Nestin-cre	CNO	7.95624
Nestin-cre	CNO	13.0564
Nestin-cre	CNO	12.9785
Nestin-cre	CNO	13.4359
Nestin-cre	CNO	13.3587
Nestin-cre:Gi	Veh	13.7078
Nestin-cre:Gi	Veh	10.1158
Nestin-cre:Gi	Veh	11.2093
Nestin-cre:Gi	Veh	10.5777
Nestin-cre:Gi	Veh	12.8983
Nestin-cre:Gi	Veh	14.051
Nestin-cre:Gi	Veh	7.83433
Nestin-cre:Gi	Veh	10.5934
Nestin-cre:Gi	Veh	17.447
Nestin-cre:Gi	CNO	17.4023
Nestin-cre:Gi	CNO	12.5144
Nestin-cre:Gi	CNO	12.3182
Nestin-cre:Gi	CNO	17.3514
Nestin-cre:Gi	CNO	12.8941
Nestin-cre:Gi	CNO	9.64454
Nestin-cre:Gi	CNO	14.3995
Nestin-cre:Gi	CNO	16.8183
Nestin-cre:Gi	CNO	14.084
k
Treatment	Genotype	Trial	SWR Frequency
Veh	Nestin-cre	Baseline	0.224015
Veh	Nestin-cre	Baseline	0.161444
Veh	Nestin-cre	Baseline	0.16675
Veh	Nestin-cre:Gi	Baseline	0.103324
Veh	Nestin-cre:Gi	Baseline	0.161905
Veh	Nestin-cre:Gi	Baseline	0.195919
Veh	Nestin-cre:Gi	Baseline	0.212542
Veh	Nestin-cre:Gi	Baseline	0.138257
Veh	Nestin-cre:Gi	Baseline	0.136668
Veh	Nestin-cre	Social	0.76971
Veh	Nestin-cre	Social	0.418974
Veh	Nestin-cre	Social	0.387251
Veh	Nestin-cre:Gi	Social	0.414203
Veh	Nestin-cre:Gi	Social	0.494254
Veh	Nestin-cre:Gi	Social	0.651901
Veh	Nestin-cre:Gi	Social	0.504064
Veh	Nestin-cre:Gi	Social	0.284372
Veh	Nestin-cre:Gi	Social	0.508125
CNO	Nestin-cre	Baseline	0.112531
CNO	Nestin-cre	Baseline	0.158826
CNO	Nestin-cre	Baseline	0.141022
CNO	Nestin-cre	Baseline	0.185891
CNO	Nestin-cre:Gi	Baseline	0.177895
CNO	Nestin-cre:Gi	Baseline	0.198525
CNO	Nestin-cre:Gi	Baseline	0.101187
CNO	Nestin-cre:Gi	Baseline	0.245005
CNO	Nestin-cre:Gi	Baseline	0.173672
CNO	Nestin-cre:Gi	Baseline	0.15943
CNO	Nestin-cre:Gi	Baseline	0.11627
CNO	Nestin-cre	Social	0.266207
CNO	Nestin-cre	Social	0.362385
CNO	Nestin-cre	Social	0.46852
CNO	Nestin-cre	Social	0.53242
CNO	Nestin-cre:Gi	Social	0.528502
CNO	Nestin-cre:Gi	Social	0.413714
CNO	Nestin-cre:Gi	Social	0.299273
CNO	Nestin-cre:Gi	Social	0.727455
CNO	Nestin-cre:Gi	Social	0.488925
CNO	Nestin-cre:Gi	Social	0.37292
CNO	Nestin-cre:Gi	Social	0.234146
l
Genotype	Treatment	SWR DS
Nestin-cre	Veh	1.25013
Nestin-cre	Veh	1.76261
Nestin-cre	Veh	0.489547
Nestin-cre	Veh	0.171803
Nestin-cre	CNO	0.334036
Nestin-cre	CNO	0.0490722
Nestin-cre	CNO	0.270743
Nestin-cre	CNO	0.544013
Nestin-cre	CNO	1.31028
Nestin-cre:Gi	Veh	-0.140342
Nestin-cre:Gi	Veh	0.617584
Nestin-cre:Gi	Veh	0.963531
Nestin-cre:Gi	Veh	0.0301227
Nestin-cre:Gi	Veh	1.27672
Nestin-cre:Gi	Veh	-0.115423
Nestin-cre:Gi	Veh	0.406467
Nestin-cre:Gi	CNO	0.58024
Nestin-cre:Gi	CNO	-0.018545
Nestin-cre:Gi	CNO	0.904644
Nestin-cre:Gi	CNO	1.87799
Nestin-cre:Gi	CNO	1.20244
Nestin-cre:Gi	CNO	0.415967
Nestin-cre:Gi	CNO	-0.489563
m
Genotype	Treatment	SWR Frequency (Social)
Nestin-cre	Veh	0.76971
Nestin-cre	Veh	0.418974
Nestin-cre	Veh	0.387251
Nestin-cre	Veh	0.621086
Nestin-cre	CNO	0.266207
Nestin-cre	CNO	0.362385
Nestin-cre	CNO	0.46852
Nestin-cre	CNO	0.53242
Nestin-cre	CNO	0.50053
Nestin-cre:Gi	Veh	0.541683
Nestin-cre:Gi	Veh	0.414203
Nestin-cre:Gi	Veh	0.494254
Nestin-cre:Gi	Veh	0.394223
Nestin-cre:Gi	Veh	0.651901
Nestin-cre:Gi	Veh	0.504064
Nestin-cre:Gi	Veh	0.284372
Nestin-cre:Gi	Veh	0.508125
Nestin-cre:Gi	CNO	0.249893
Nestin-cre:Gi	CNO	0.528502
Nestin-cre:Gi	CNO	0.413714
Nestin-cre:Gi	CNO	0.299273
Nestin-cre:Gi	CNO	0.727455
Nestin-cre:Gi	CNO	0.488925
Nestin-cre:Gi	CNO	0.37292
Nestin-cre:Gi	CNO	0.234146
n
Genotype	Treatment	SWR Peak z-score (Social)
Nestin-cre	Veh	10.99
Nestin-cre	Veh	9.55024
Nestin-cre	Veh	11.8622
Nestin-cre	Veh	11.5645
Nestin-cre	CNO	6.82008
Nestin-cre	CNO	11.5602
Nestin-cre	CNO	9.88779
Nestin-cre	CNO	11.0468
Nestin-cre	CNO	13.47
Nestin-cre:Gi	Veh	10.3646
Nestin-cre:Gi	Veh	11.1276
Nestin-cre:Gi	Veh	12.041
Nestin-cre:Gi	Veh	13.3995
Nestin-cre:Gi	Veh	9.98177
Nestin-cre:Gi	Veh	12.6572
Nestin-cre:Gi	Veh	7.48514
Nestin-cre:Gi	Veh	12.7018
Nestin-cre:Gi	CNO	13.4571
Nestin-cre:Gi	CNO	11.3718
Nestin-cre:Gi	CNO	11.8099
Nestin-cre:Gi	CNO	7.9122
Nestin-cre:Gi	CNO	11.531
Nestin-cre:Gi	CNO	7.54438
Nestin-cre:Gi	CNO	12.8439
Nestin-cre:Gi	CNO	14.1302
o
Genotype	Treatment	SWR Frequency (Baseline)
Nestin-cre	Veh	0.224015
Nestin-cre	Veh	0.161444
Nestin-cre	Veh	0.16675
Nestin-cre	Veh	0.246314
Nestin-cre	CNO	0.112531
Nestin-cre	CNO	0.158826
Nestin-cre	CNO	0.141022
Nestin-cre	CNO	0.185891
Nestin-cre	CNO	0.213544
Nestin-cre:Gi	Veh	0.308038
Nestin-cre:Gi	Veh	0.103324
Nestin-cre:Gi	Veh	0.161905
Nestin-cre:Gi	Veh	0.100807
Nestin-cre:Gi	Veh	0.195919
Nestin-cre:Gi	Veh	0.212542
Nestin-cre:Gi	Veh	0.138257
Nestin-cre:Gi	Veh	0.136668
Nestin-cre:Gi	CNO	0.131086
Nestin-cre:Gi	CNO	0.177895
Nestin-cre:Gi	CNO	0.198525
Nestin-cre:Gi	CNO	0.101187
Nestin-cre:Gi	CNO	0.245005
Nestin-cre:Gi	CNO	0.173672
Nestin-cre:Gi	CNO	0.15943
Nestin-cre:Gi	CNO	0.11627
p
Genotype	Treatment	SWR Peak z-score (Baseline)
Nestin-cre	Veh	15.582
Nestin-cre	Veh	9.71735
Nestin-cre	Veh	10.3634
Nestin-cre	Veh	12.7365
Nestin-cre	CNO	7.01525
Nestin-cre	CNO	10.4492
Nestin-cre	CNO	10.4199
Nestin-cre	CNO	14.1851
Nestin-cre	CNO	16.8708
Nestin-cre:Gi	Veh	11.1571
Nestin-cre:Gi	Veh	11.9741
Nestin-cre:Gi	Veh	10.6027
Nestin-cre:Gi	Veh	13.0655
Nestin-cre:Gi	Veh	13.8146
Nestin-cre:Gi	Veh	8.34022
Nestin-cre:Gi	Veh	6.71151
Nestin-cre:Gi	Veh	15.8659
Nestin-cre:Gi	CNO	12.4508
Nestin-cre:Gi	CNO	12.1656
Nestin-cre:Gi	CNO	13.7222
Nestin-cre:Gi	CNO	7.42282
Nestin-cre:Gi	CNO	12.6129
Nestin-cre:Gi	CNO	8.10528
Nestin-cre:Gi	CNO	13.4769
Nestin-cre:Gi	CNO	13.8514
