# Supplementary material for: Adult-born granule cells modulate CA2 network activity during retrieval of developmental memories of the mother
Source: eLife. 2024 Jun 4;12:RP90600. doi: 10.7554/eLife.90600 (PMC11149928; doi:10.7554/eLife.90600)
Supplement: Figure 4—source data 1. [file elife-90600-fig4-data1.xlsx]

## Sheet: Sheet1
d
Genotype	Treatment	MI
Nestin-cre	Veh	1.27745
Nestin-cre	Veh	1.14048
Nestin-cre	Veh	2.58517
Nestin-cre	Veh	1.49518
Nestin-cre	Veh	1.17613
Nestin-cre	Veh	0.721612
Nestin-cre	Veh	1.10187
Nestin-cre	CNO	1.74367
Nestin-cre	CNO	1.56734
Nestin-cre	CNO	2.96805
Nestin-cre	CNO	0.884877
Nestin-cre	CNO	0.79048
Nestin-cre	CNO	0.535173
Nestin-cre	CNO	1.34038
Nestin-cre:Gi	Veh	1.50781
Nestin-cre:Gi	Veh	0.911134
Nestin-cre:Gi	Veh	1.73063
Nestin-cre:Gi	Veh	0.935946
Nestin-cre:Gi	Veh	3.37644
Nestin-cre:Gi	Veh	1.21512
Nestin-cre:Gi	Veh	0.44308
Nestin-cre:Gi	Veh	2.79665
Nestin-cre:Gi	CNO	0.785792
Nestin-cre:Gi	CNO	1.08545
Nestin-cre:Gi	CNO	1.37679
Nestin-cre:Gi	CNO	0.371301
Nestin-cre:Gi	CNO	0.94956
Nestin-cre:Gi	CNO	0.839607
Nestin-cre:Gi	CNO	1.58563
Nestin-cre:Gi	CNO	1.36211
g
Genotype	Treatment	MI
Nestin-cre	Veh	2.90551
Nestin-cre	Veh	0.74402
Nestin-cre	Veh	0.572279
Nestin-cre	Veh	3.01339
Nestin-cre	CNO	0.875354
Nestin-cre	CNO	1.08441
Nestin-cre	CNO	1.68659
Nestin-cre	CNO	1.32454
Nestin-cre	CNO	1.98182
Nestin-cre:Gi	Veh	1.57404
Nestin-cre:Gi	Veh	1.01875
Nestin-cre:Gi	Veh	0.406554
Nestin-cre:Gi	Veh	2.20432
Nestin-cre:Gi	Veh	1.13042
Nestin-cre:Gi	Veh	1.49837
Nestin-cre:Gi	CNO	2.2397
Nestin-cre:Gi	CNO	1.01475
Nestin-cre:Gi	CNO	0.715442
Nestin-cre:Gi	CNO	1.1692
Nestin-cre:Gi	CNO	1.35045
Nestin-cre:Gi	CNO	1.22643
Nestin-cre:Gi	CNO	0.763095
